# Supplementary material for: Status update: is smoke on your mind? Using social media to assess smoke exposure
Source: Copernicus journal article supplement (doi:10.5194/acp-17-7541-2017), 2017-06-22
Supplement: Supplementary file 1 [file acp-17-7541-2017-supplement.pdf]

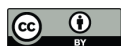

## *Supplement of*

# **Status update: is smoke on your mind? Using social media to assess smoke exposure**

**Bonne Ford et al.**

*Correspondence to:* Bonne Ford ([bonne@atmos.colostate.edu](mailto:bonne@atmos.colostate.edu))

The copyright of individual parts of the supplement might differ from the CC BY 3.0 License.

## Supplement

### Search Criteria:

text RLIKE 'smoke|smoky|haze|hazy|air quality'

text NOT RLIKE 'cigarette|i smoke|a smoke|we smoke|to smoke|gonna smoke|smoker|smoke free home|smoke free pet free|second hand|u smoke|you smoke|smoke signals|can smoke|can t smoke|cant smoke|don t smoke|dont smoke|pack of smoke|who smokes|who smoke|smoke a|smoked a|smoking home|smoking|smokeing|smoke this|smoked|hazel'

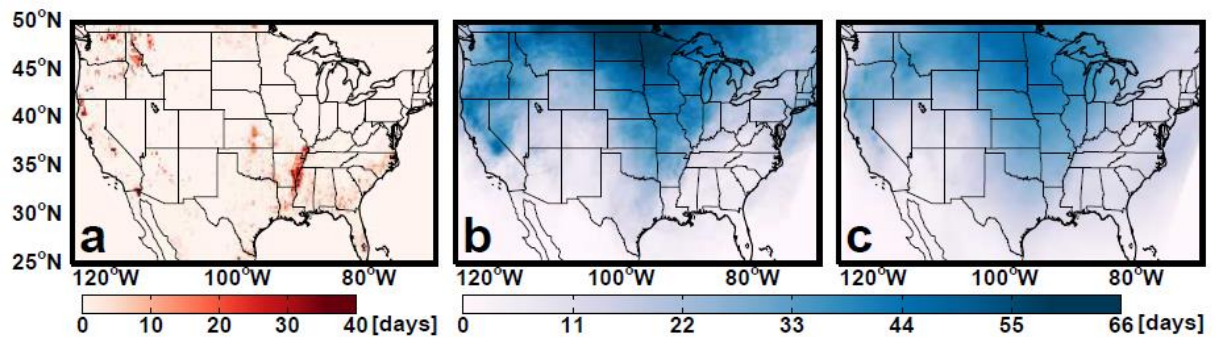

**Figure S1.** Number of days where the HMS product noted (a) a fire or (b) smoke for June 1-September 30, 2015 and (c) the average number of days in June 1-September 30 where the HMS product noted smoke for 2006-2014.

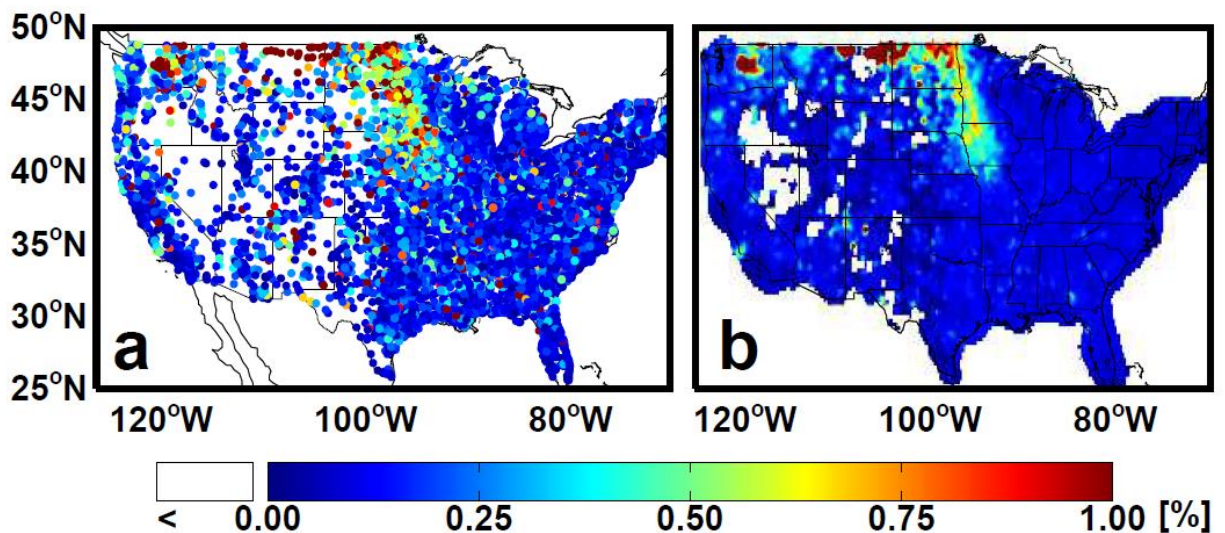

**Figure S2.** Percent of Facebook posters meeting our search criteria for 29 June 2012 a.) “Raw” values with points representing city centroids and b.) gridded and population-weighted values (white signifies no data or regions with weighted population < 10).

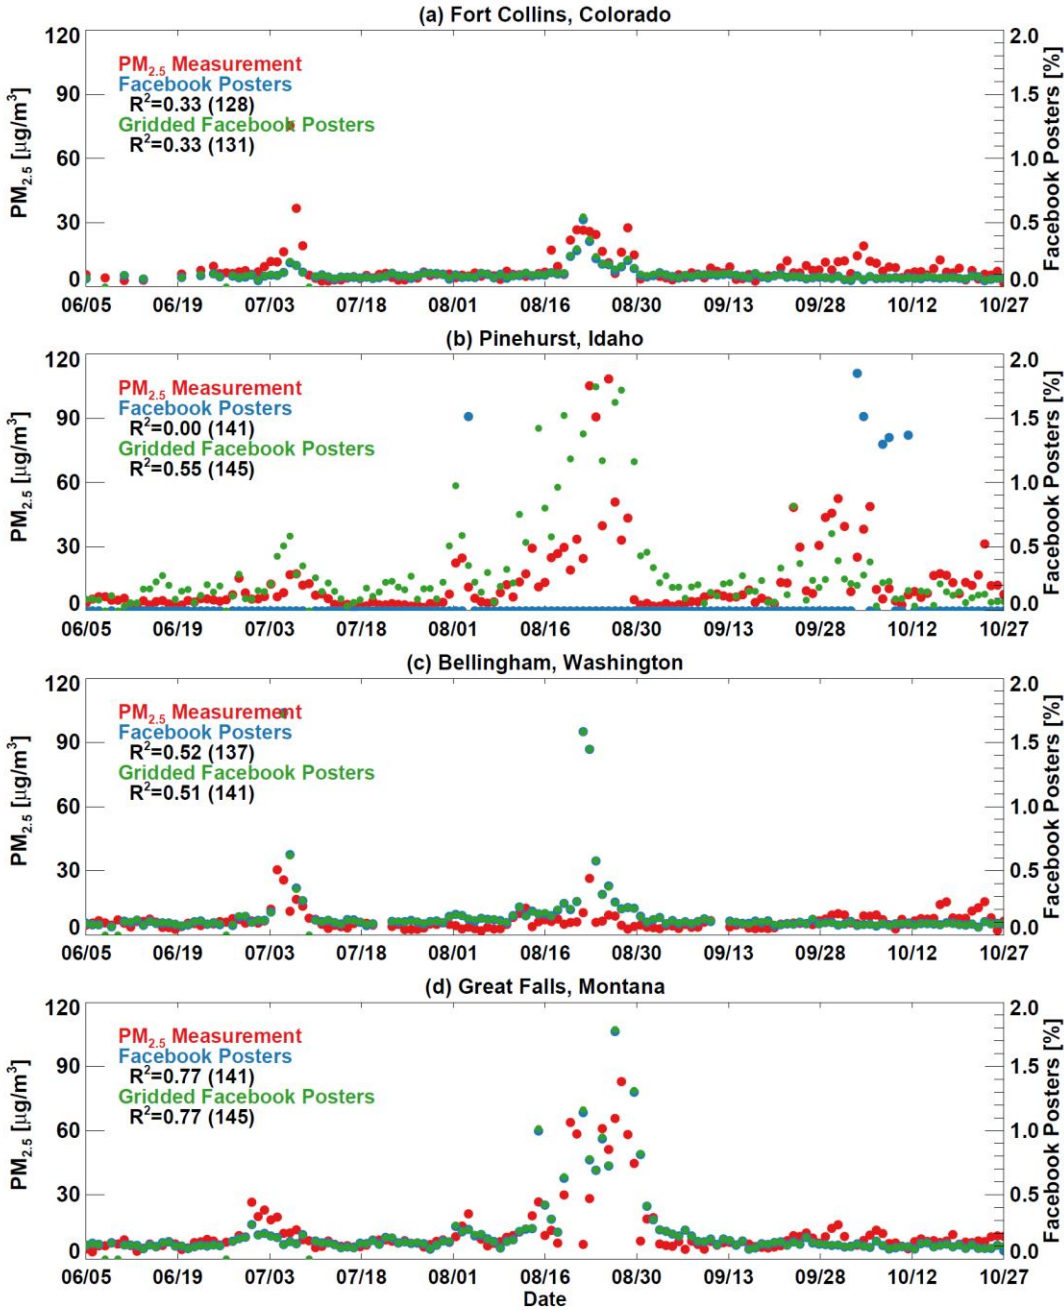

**Figure S3.** Time series of measured surface  $PM_{2.5}$  concentrations (red), “raw” percent of Facebook posters matching criteria (blue), and gridded and population-weighted percent of Facebook posters (green), at (a) Fort Collins, CO; (b) Pinehurst, ID; (c) Bellingham, WA; and (d) Great Falls, MT for 5 June – 27 October 2015.  $R^2$  values for each dataset with the surface measurement are given along with the number of days available for the calculation noted in parentheses.



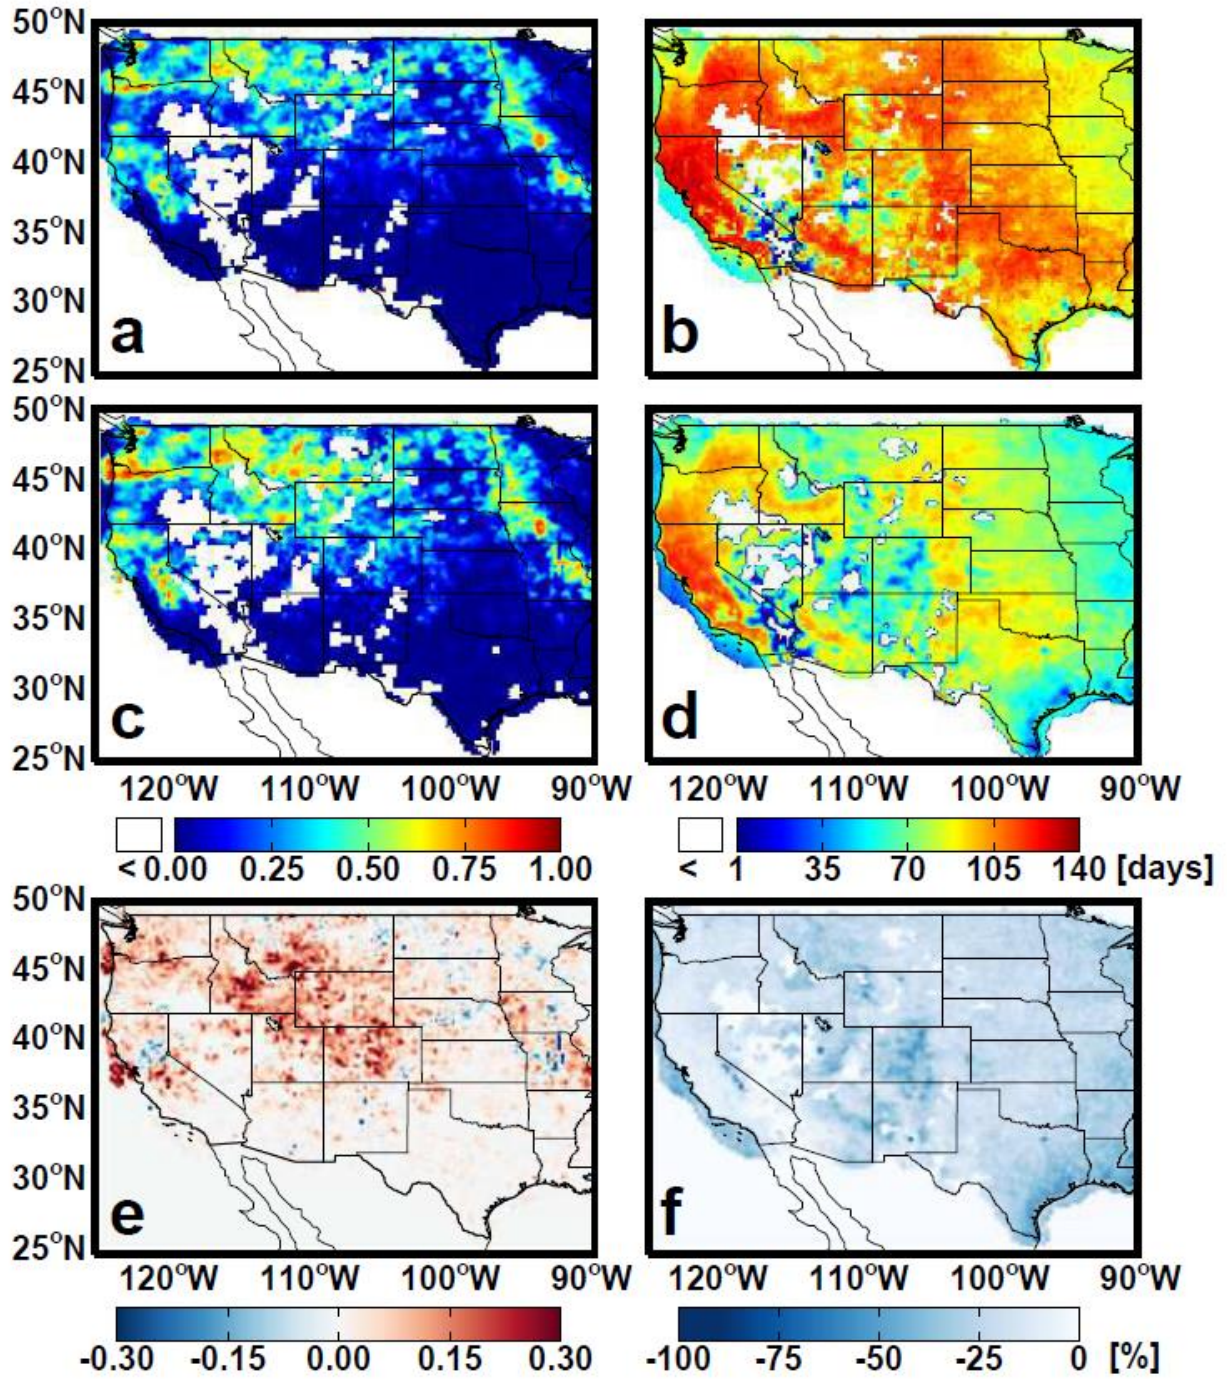

**Figure S4.**  $R^2$  for % Facebook posters and MODIS AOD for (a) all cloud fractions and (c) cloud fraction  $< 0.75$ , number of days meeting criteria (b, d), (e) the change in  $R^2$ , and (f) change in number of days as a percent of the total observation days.

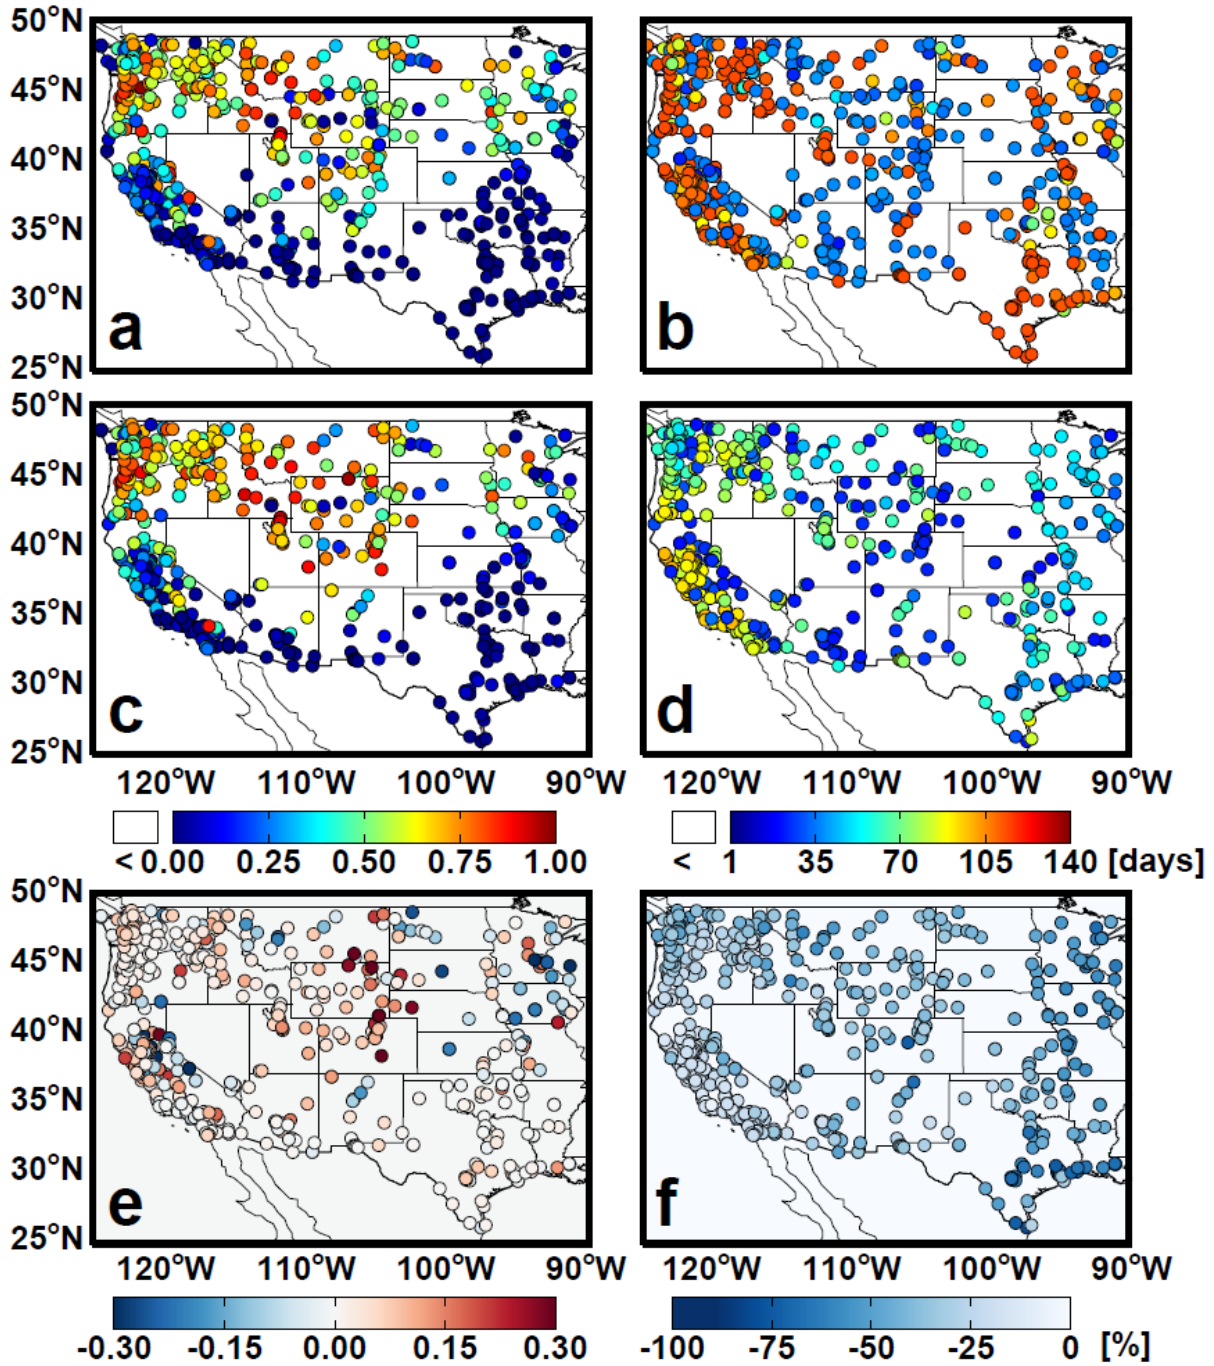

**Figure S5.**  $R^2$  for % Facebook posters and surface concentrations for (a) all cloud fractions and (c) cloud fraction < 0.75, number of days meeting criteria (b, d), (e) the change in  $R^2$ , and (f) change in number of days as a percent of the total observation days.
